# Supplementary material
Source: PubMed Central journal article supplement (PMC2941174)

Supplementary Figure S2:

A: Table: Comparison of fold-changes of TA synapses vs. TA non-synaptic areas.

| Probeset ID (rat)                  | Gene description                                              | Gene Symbol      | Fold-changes: TA synapse vs TA non-synaptic areas |                     |
|------------------------------------|---------------------------------------------------------------|------------------|---------------------------------------------------|---------------------|
|                                    |                                                               |                  | This study                                        | Nazarian et al 2005 |
| 1369843_at                         | cholinergic receptor, nicotinic, alpha polypeptide 1 (muscle) | Chrna1           | 300.8                                             | 5.5                 |
| 1369137_at                         | cholinergic receptor, nicotinic, epsilon polypeptide          | Chrne            | 117.5                                             | 8.9                 |
| 1377064_at; 1382778_at; 1387024_at | dual specificity phosphatase 6                                | Dusp6            | 80.3; 60.9; 99.7                                  | 7.2                 |
| 1386948_at                         | nestin                                                        | Nes              | 79.8                                              | 4.0                 |
| 1373911_at                         | periostin, osteoblast specific factor (predicted)             | Postn_predicted  | 184.0                                             | 13.2                |
| 1374376_at; 1382258_at             | Rho-guanine nucleotide exchange factor (predicted)            | Rgnef_predicted  | 2.1                                               | 4.1                 |
| 1376657_at                         | cell adhesion molecule 1                                      | Cadm1            | 3.1                                               | 3.8                 |
| 1379724_at                         | pleckstrin homology-like domain, family B, member 2           | Phldb2           | 14.2                                              | 12.8                |
| 1387313_at                         | myocilin                                                      | Myoc             | 10.2                                              | 4.0                 |
| 1390404_at                         | laminin, alpha 2 (predicted)                                  | Lama2_predicted  | 23.1                                              | 3.2                 |
| 1392965_a_at                       | SPARC related modular calcium binding 2 (predicted)           | Smoc2_predicted  | 10.4                                              | 2.7                 |
| 1367938_at                         | UDP-glucose dehydrogenase                                     | Ugdh             | 3.3                                               | 2.1                 |
| 1370942_at                         | RAS p21 protein activator 3                                   | Rasa3            | 3.7                                               | 2.3                 |
| 1370959_at                         | collagen, type III, alpha 1                                   | Col3a1           | 3.7                                               | 4.5                 |
| 1371310_s_at                       | serine (or cysteine) peptidase inhibitor, clade H, member 1   | Serpinh1         | 2.8                                               | 4.1                 |
| 1373421_at                         | TG interacting factor 1                                       | Tgif1            | 2.0                                               | 2.0                 |
| 1367631_at                         | connective tissue growth factor                               | Ctgf             | 3.5                                               | 7.1                 |
| 1383863_at                         | LIM domain only 2                                             | Lmo2             | 8.7                                               | 2.1                 |
| 1388697_at                         | inositol polyphosphate-5-phosphatase A (predicted)            | Inpp5a_predicted | 2.2                                               | 3.0                 |
| 1389265_at                         | glucan (1,4-alpha-), branching enzyme 1                       | Gbe1             | -2.2                                              | 2.0                 |

B. Venn diagram of number of genes in TA synapse vs TA non-synaptic areas.

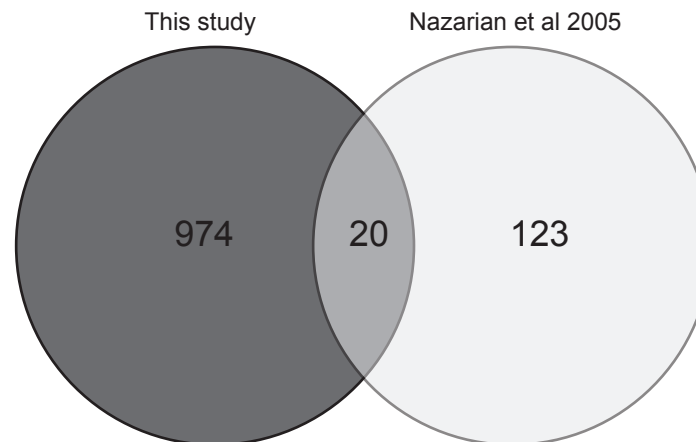

Supplement: supp_51_9_4589__2.pdf [file supp_51_9_4589__2.pdf]
