# Supplementary material
Source: PubMed Central journal article supplement (PMC2941174)
Supplement: supp_51_9_4589__1.pdf [file supp_51_9_4589__1.pdf]

## TA serial sections (10 $\mu$ m) stained for AChE

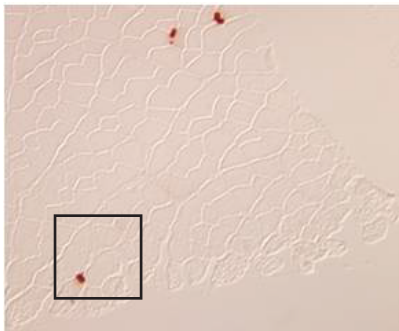

Image #135

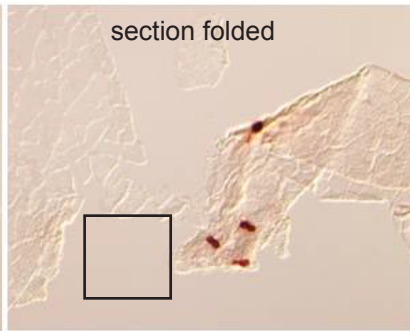

Image #136

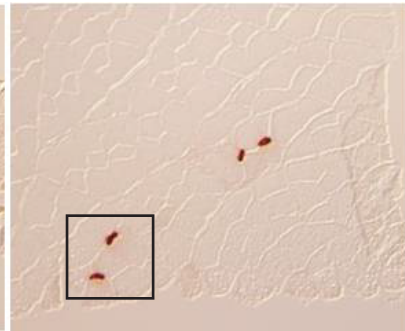

Image #137

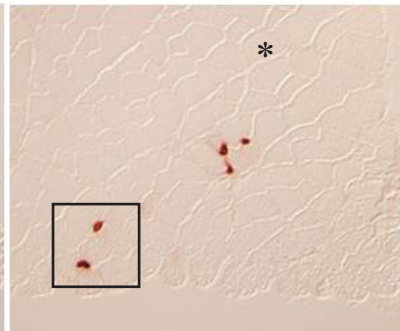

Image #138

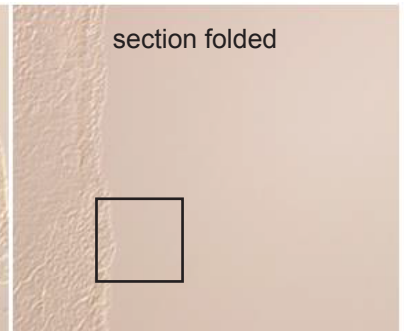

Image #139

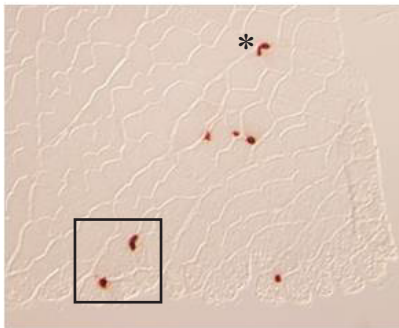

Image #140

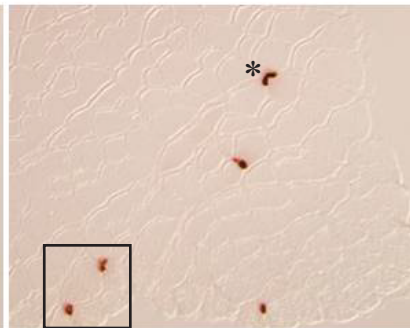

Image #141

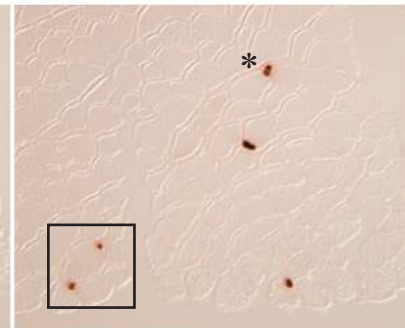

Image #142

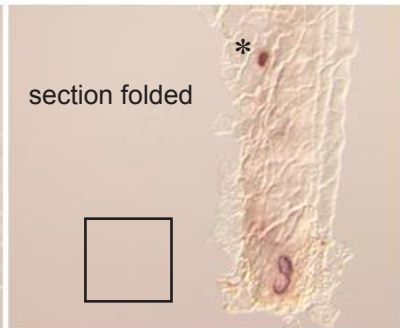

Image #143

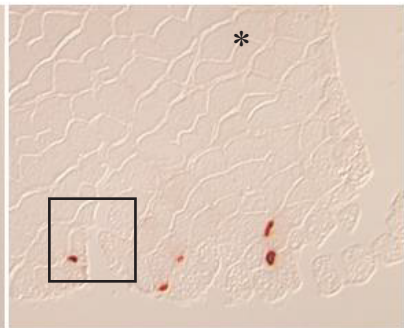

Image #144

Supplementary Fig. S1: Serial sections of TA muscle (10 $\mu$ m) stained for AChE demonstrating the distribution of synapses. Synapses can be seen to run for 4 sections (asterisk), 6 sections (top Rt. in the square) and 10 sections (bottom Lt. in the square).
